# Supplementary material
Source: PubMed Central journal article supplement (PMC6146683)
Supplement: zjv018183836s1.pdf [file zjv018183836s1.pdf]

**Table S1. Genes differentially expressed among groups (Up-regulated genes)**

Criteria: (i) a p-value < 0.001, (ii) a q-value < 0.001, (iii) fold-change > 1.5

| Control V.S. ILTV (EGFP+) |              |           |          | Control V.S. ILTV (APC+) |          |          | Control V.S. Conditioned medium (APC+) |              |         |            |
|---------------------------|--------------|-----------|----------|--------------------------|----------|----------|----------------------------------------|--------------|---------|------------|
| 42252                     | EPS15        | NEDD4     | STXBP1   | 42252                    | HVCN1    | SLC22A23 | 42252                                  | DUSP10       | MBL2    | SFXN1      |
| 42258                     | ERRF1        | NEFL      | SULT1E1  | AARS                     | IDH2     | SLC24A3  | 42258                                  | DUSP7        | MBNL2   | SFXN3      |
| AARS                      | ETFA         | NET1      | TAGLN2   | ACAD11                   | IGSF21   | SLC25A29 | AARS                                   | DZIP1L       | MCOLN1  | SGK1       |
| ABCC2                     | ETS2         | NOG       | TBC1D15  | ACAT1                    | ILK      | SLC25A33 | ABCA3                                  | ECH1         | MEP1B   | SHH        |
| ABCD2                     | ETV5         | NR4A2     | TCEB3    | ACER3                    | IMP4     | SLC2A1   | ABCA7                                  | ECHS1        | MFGF8   | SIK1       |
| ABLM2                     | EX-FABP      | NRBP1     | TCP11L2  | ACO2                     | INPP5B   | SLC35C2  | ABCC2                                  | ECI2         | MFSD1   | SIRT2      |
| ABR                       | EXOC8        | OAZ1      | TDP2     | ADD3                     | JARID2   | SLC38A2  | ABCC8                                  | ECI2         | MGAT5B  | SIRT6      |
| ACAA2                     | F2R          | OGCHI     | TEAD3    | AFAP1                    | JTB      | SLC7A11  | ABR                                    | EDA          | MGLL    | SLC12A5    |
| ACAP3                     | FADS1        | OSGIN1    | TEKT4    | AFAP1L2                  | KCTD20   | SLC04A1  | ABTB1                                  | EDN1         | MGP     | SLC13A3    |
| ACAT1                     | FADS6        | PAM       | TEN1     | AGTRAP                   | KCTD21   | SNAI1    | ACACB                                  | EEF1D        | MGST3   | SLC16A3    |
| ACER3                     | FAM114A2     | PATL2     | TES      | AK1                      | KIT      | SNRPA1   | ACAT1                                  | EHF          | MICU1   | SLC16A5    |
| ACO2                      | FAM180A      | PCDH8     | TEX264   | AKR1B10                  | KLF5     | SNX14    | ACER3                                  | EIF1         | MINOS1  | SLC1A4     |
| ACOX1                     | FAM46D       | PCMTD1    | TFAP2C   | ALDH18A1                 | KLF6     | SOCS1    | ACO2                                   | EIF4E3       | MKRN1   | SLC22A23   |
| ADAM28                    | FAM49A       | PCSK5     | TFCP2L1  | ALDH7A1                  | KLHDC5   | SOD2     | ACOX1                                  | EIF5B        | MMP9    | SLC25A29   |
| ADAMTS1                   | FBXL5        | PCSK6     | TMED4    | ALDOC                    | KLHL29   | SORL1    | ACSL5                                  | ELF3         | MOSC2   | SLC25A33   |
| ADCK3                     | FBXO25       | PDCD4     | TMEM116  | AMFR                     | KLHL6    | SPTBN5   | ADAMTS1                                | EMP2         | MPP2    | SLC2A1     |
| ADD1                      | FHL3         | PDCD6IP   | TMEM131  | AMZ1                     | KPNA6    | ST5      | ADCK3                                  | ENO2         | MPP1    | SLC35C2    |
| ADD3                      | FKBP12       | PDK3      | TMEM180  | ANKRD22                  | LDHA     | STX11    | ADD1                                   | ENSA         | MPST    | SLC38A2    |
| AFAP1                     | FMO4         | PDLM1     | TMEM59L  | ANKRD9                   | LEPRE1   | SULT1E1  | ADD3                                   | EPB41L2      | MRPS21  | SLC4A10    |
| AGTRAP                    | FNDCA3       | PDP1      | TNFAIP2  | ARHGDI1                  | LGALS2   | SWIP-1   | ADH1B                                  | EPHX2        | MRV1    | SLC6A18    |
| AHCYL2                    | FOXP2        | PELI2     | TNFIP6   | ASL2                     | LGMN     | TADA1L   | AFAP1                                  | EPSTI1       | MSC     | SLC6A6     |
| AHR                       | FTH          | PEPD      | TNFRSF18 | ASNS                     | LHCGR    | TAGLN2   | AGTRAP                                 | ERO1L        | MT-CO1  | SLC7A10    |
| AIOLOS                    | GOS2         | PFND2     | TNFRSF21 | ATF4                     | LHFPL2   | TARS     | AK1                                    | ERO1LB       | MT-CO3  | SLCO4A1    |
| AK7                       | GADD45       | PFKP      | TP53INP1 | ATP2B2                   | LMBR1    | TBC1D15  | AKR1B10                                | ESRP2        | MT-CYB  | SMPD1      |
| AKR1B10                   | GADD45B      | PGM1      | TPN      | ATP5A1                   | LPAR2    | TCEA3    | ALDH18A1                               | ETV5         | MTHFD2  | SNAI1      |
| ALDH18A1                  | GAPDH        | PHGDH     | TRANK1   | ATP5B                    | LPL      | TCEB3    | ALDH7A1                                | EX-FABP      | MT-ND1  | SNX14      |
| ALDH1A1                   | GAPVD1       | PHLDA2    | TRAPPC4  | ATP5C1                   | LRRC45   | TEAD3    | ALDH9A1                                | EXOC5        | MT-ND2  | SOAT1      |
| ALDH6                     | GARNL3       | PHOSPHO1  | TRIB2    | ATP5F1                   | LRAM1    | TEKT4    | ALDOC                                  | FABP5        | MT-ND3  | SORL1      |
| ALDH7A1                   | GARS         | PI4K2A    | TSC22D1  | ATP5G1                   | MAFF     | TEN1     | ALG11                                  | FADS6        | MT-ND4  | SPATS2L    |
| AMFR                      | GATM         | PIGZ      | TSPAN1   | ATP5G2                   | MARVELD3 | TEX264   | ALX-4                                  | FAHD2A       | MT-ND5  | SPP2       |
| AMZ1                      | GDPD5        | PIK3AP1   | TSPAN6   | ATP5G3                   | MAT1A    | TMED4    | AMDHD2                                 | FAM188A      | MTSS1   | ST3GAL1    |
| ANKMY1                    | GEM          | PIM3      | TST      | ATP5H                    | MBL2     | TMEM138  | AMFR                                   | FAM213A      | MYC     | ST6GALNAC1 |
| ANKRD1                    | GGA.42010    | PKM       | TSTA3    | ATP6V0B                  | MDH1     | TMEM167B | AMN                                    | FAM3D        | MYL12B  | STAMBP     |
| ANKRD22                   | gga-mir-3527 | PKP1      | TTYH3    | AUP1                     | MDH2     | TMEM45B  | AMZ1                                   | FAM46A       | MYLIP   | STXBP1     |
| ANKRD9                    | GHITM        | PLA2G7    | TUBB2B   | BCAP29                   | METTL7A  | TMEM59L  | ANKRD22                                | FAM49A       | NADK    | SULT1B1    |
| ANKS4B                    | GHOX-7       | PLAG1     | TUBB2B   | BCAS1                    | MGAT5B   | TNFRSF18 | ANKRD44                                | FAM54B       | NAGA    | SULT1E1    |
| ANO10                     | GLIPR1       | PLEKH2    | TUBB6    | BMP2                     | MGST3    | TPI1     | ANKRD9                                 | FAM86A       | NAV2    | SVIP       |
| APCDD1                    | GLIPR1L2     | PLIN2     | TUFT1    | C11ORF87                 | MLL2     | TPN      | ANKZF1                                 | FBP1         | NBEAL2  | TADA1L     |
| APLP2                     | GLRX5        | PLIN5     | TVB      | C12ORF57                 | MMP1     | TRAPPC4  | APP                                    | FBXO25       | NBL1    | TAGLN2     |
| ARHGAP12                  | GNAI2        | PLK2      | TXN      | C1ORF21                  | MNAT1    | TSC22D1  | ARHGDI1                                | FEM1A        | NC4     | TBC1D15    |
| ARHGAP40                  | GNAI2        | PLK3      | TXNRD1   | C2ORF18                  | MRPL17   | TSPAN1   | ARRDC3                                 | FEZ1         | NDVIP1  | TCEA3      |
| ARHGAP7                   | GOLGB1       | PLSCR4    | UBB      | C3H6ORF72                | MRPL9    | TSPAN6   | ASL2                                   | FHL3         | NDRG1   | TEAD3      |
| ARID4B                    | GPR12        | PNPLA7    | UBE2H    | C4                       | MRPS21   | TST      | ASNS                                   | FKBP10       | NDST3   | TEX264     |
| ARRDC3                    | GPR177       | PNRC1     | UBQLN1   | C8ORF22                  | MTCH2    | UBB      | ATF4                                   | FMO4         | NDUFS1  | TM9SF4     |
| ASB14                     | GPRC5A       | PPA1      | UCH-L1   | CARS2                    | MTHFD2   | UBE2H    | ATG13                                  | FMO6P        | NDUFS3  | TMCO3      |
| ASCC1                     | GPS1         | PPARG     | UCK2     | CCBP2                    | MT-ND3   | UBXN2B   | ATP5A1                                 | FOS          | NDUFS4  | TMEM116    |
| ASL2                      | GPX4         | PPARGC1A  | UHMK1    | CCDC109B                 | MUC13    | UCH-L1   | ATP5B                                  | FTH          | NDUFS7  | TMEM159    |
| ASNS                      | GSS          | PPFIA1    | ULK2     | CDA                      | MUDENG   | UHMK1    | ATP5G1                                 | FTSJD1       | NDUFS8  | TMEM161A   |
| ATP5A1                    | GSTO1        | PPM1J     | UQCRC1   | CDHR1                    | NDRG1    | UQCRC1   | ATP5G2                                 | FURIN        | NELFE   | TMEM188    |
| ATP5G1                    | GUSB         | PPP1R15B  | UROD     | CHEPB                    | NDUFA9   | UQCRC2   | ATP6                                   | GOS2         | NFIL3   | TMEM38B    |
| ATP5H                     | HADHA        | PRDX6     | USP49    | CERCAM                   | NDUFS2   | UQCRCQ   | BACH2                                  | GADD45B      | NFYC    | TMEM59L    |
| ATP6V0D2                  | HBP1         | PRELID1   | WARS     | CGN                      | NDUFS3   | UROD     | BAIAP2L1                               | GAL10        | NIPAL1  | TMEM72     |
| BACH2                     | HDAC1        | PRKAG2    | WDR1     | CHAC1                    | NDUFS4   | USP49    | BCAP29                                 | GAPDH        | NOVA1   | TMEM82     |
| BAIAP2L1                  | HDAC7        | PROK2     | WNT11    | CHCHD2                   | NDUFS7   | VGLL2    | BF1                                    | GAREM        | NPC2    | TNFAIP2    |
| BBS2                      | HERPUD1      | PSAP      | WNT7B    | CHNTHL1                  | NDUFS8   | VRTN     | BFIV21                                 | GARS         | NPL     | TNFIP6     |
| BCAP29                    | HEXA         | PSMB7     | XG       | CHTL1A                   | NEDD4L   | WARS     | BID                                    | GATA2        | NQO1    | TNFRSF18   |
| BCAS1                     | HIF1A        | PSMC1     | YARS     | CIB1                     | NEFL     | WDR1     | BSG                                    | GBE1         | NUMA1   | TNFSF11    |
| BCR                       | HMBS         | PSPH      | YIPF1    | CISD2                    | NFYC     | YARS     | C11ORF82                               | GC           | OAZ1    | TNS3       |
| BMP2                      | HMGCS1       | PTAFR     | ZFYVE28  | CISD3                    | NPC2     | YIPF1    | C11ORF87                               | GCC2         | OCC-1   | TOB2       |
| C11ORF24                  | HMOX1        | PTGES     | ZMAT4    | CLCN2                    | NPL      | ZNF503   | C12H3ORF37                             | GCHFR        | OGCHI   | TPN        |
| C11ORF87                  | HN1          | PTGS2     | ZNF503   | CLDN1                    | NUBP1    |          | C16ORF57                               | GFR3         | OLFML2A | TRAK1      |
| C12H3ORF37                | HPS3         | PTTG1IP   | ZNF516   | CLDN10                   | OAZ1     |          | C1H11ORF67                             | GGA.40537    | OSGIN1  | TRANK1     |
| C12ORF57                  | HSCB         | PYCR2     |          | CNN2                     | OGCHI    |          | C1ORF21                                | GGA.42010    | OTUD1   | TRAPPC4    |
| C14ORF79                  | HSD17B7      | PYGB      |          | COL23A1                  | OLFML2A  |          | C2Oorf194                              | gga-mir-3527 | PACS2   | TRIB2      |
| C1H21ORF91                | HSP70        | PYGL      |          | COL6A2                   | OSGIN1   |          | C2ORF18                                | gga-mir-6599 | PAFAH2  | TRIP11     |
| C1ORF21                   | HSP90AA1     | QARS      |          | COMMD10                  | PAM16    |          | C3D                                    | GGT1         | PANK1   | TSC22D1    |
| C20H20ORF111              | HSPA5        | QSOX1     |          | COMMD4                   | PANX2    |          | C3H6ORF72                              | GNAL         | PCCB    | TSG101     |
| C20ORF23                  | HSPB8        | RAB11FIP4 |          | COMMD5                   | PCDH8    |          | C4                                     | GNB2L1       | PCMTD1  | TSPAN1     |
| C2ORF18                   | HVCN1        | RAB19     |          | COQ9                     | PCMTD1   |          | C8ORF22                                | GOLGB1       | PCSK5   | TSPAN2     |
| C3H6ORF174                | HYPK         | RAB31     |          | COX5A                    | PCSK6    |          | C8ORF4                                 | GOT1         | PCSK6   | TSPAN6     |
| C3H6ORF72                 | ID2          | RAB32     |          | COX6A1                   | PDCD4    |          | CA2                                    | GPR12        | PDCD4   | TST        |
| C4                        | IFNGR2       | RAB33B    |          | CPEB2                    | PDZK1P1  |          | CACFD1                                 | GPR177       | PDCD6IP | TTC26      |
| C4ORF34                   | IFRD1        | RAB37     |          | CREM                     | PFKP     |          | CACNA1D                                | GPRC5A       | PDHB    | TTC3       |
| C8ORF22                   | IGSF21       | RAI14     |          | CRHOB                    | PGM1     |          | CACNA2D2                               | GPS1         | PDIA3   | TTYH3      |

|         |          |           |  |              |          |  |         |          |           |         |
|---------|----------|-----------|--|--------------|----------|--|---------|----------|-----------|---------|
| CA2     | IL4I1    | RARB      |  | CS           | PHB      |  | CALHM2  | GPX4     | PK3       | UBB     |
| CASP3   | IL4R     | RASD1     |  | CSRP1        | PHGDH    |  | CAMKK2  | GSS      | PEMT      | UBE2H   |
| CCT7    | ILK      | RASSF3    |  | CSTF1        | PHLDA2   |  | CANT1   | GSTO1    | PEPD      | UGCG    |
| CD200   | INF2     | RBPJ      |  | CTH          | PHLPP1   |  | CARS    | GSTDC2   | PFKP      | UQCRC1  |
| CD47    | IRF1     | RCBTB2    |  | CTSB         | PHOSPHO1 |  | CCBP2   | GTF2H4   | PGM1      | UQCRC2  |
| CDH1    | ITM2B    | RFLB      |  | CX3CL1       | PIGZ     |  | CCPG1   | GUCY2C   | PGM3      | UROD    |
| CDH3    | JARID2   | RHOG      |  | CYB5D2       | PIK3AP1  |  | CD200   | GUSB     | PHGDH     | USP40   |
| CEBPB   | JSC      | RICTOR    |  | CYR61        | PIM3     |  | CD47    | H3-IX    | PHLDA2    | UTRN    |
| CGN     | JUP      | RIN2      |  | DACT2        | PLCG2    |  | CD81    | HACL1    | PHLPP1    | VAMP7   |
| CHAC1   | KANSL1   | RLF       |  | DCTN2        | PLCZ1    |  | CDA     | HADHA    | PHOSPHO1  | VMP1    |
| CHCHD2  | KCTD20   | RNF139    |  | DGCR6        | PLEKHA5  |  | CDH1    | HARBI1   | PHTF2     | VPS54   |
| CHTL1A  | KCTD21   | RORB      |  | DHRXS        | PLEKHB2  |  | CDH3    | HDAC1    | PI4K2A    | WARS    |
| CIAPIN1 | KERA     | RP2       |  | DLGAP2       | PLIN5    |  | CDS2    | HEG1     | PIGZ      | WDFY1   |
| CIDEC   | KHDRBS3  | RPB6      |  | DNPEP        | PLK2     |  | CEBPB   | HES1     | PIK3AP1   | WDR1    |
| CLCN3   | KIAA0040 | RPL24     |  | DOHH         | PLSCR4   |  | CERCAM  | HIF1AN   | PIK3P1    | XPR1    |
| CLDN1   | KIAA1199 | RPL27     |  | DOK5         | PNRC1    |  | CGN     | HMG20B   | PIM3      | YARS    |
| CLDN10  | KIF13B   | RPL35     |  | DSTN         | POLH     |  | CHAC1   | HOPX     | PLCG2     | YIPF1   |
| CLINT1  | KIFAP3   | RPL6      |  | DUSP1        | PPA1     |  | CHCHD2  | HPGDS    | PLEKHA5   | ZBTB20  |
| CNN2    | KIT      | RPLP0     |  | DUSP7        | PPARG    |  | CHD2    | HPX      | PLEKHB2   | ZFYVE28 |
| CNTF    | KLF1     | RPS12     |  | ECHS1        | PPARGC1A |  | CHNTHL1 | HSCB     | PLK2      | ZNF217  |
| COG7    | KLF5     | RPS15     |  | ECI1         | PPIB     |  | CHTL1A  | HSD17B11 | PNRC1     | ZNF503  |
| COL27A1 | KLF6     | RPS17     |  | EDA          | PPIE     |  | CIB1    | HSP70    | PPA1      | ZWILCH  |
| COMMD5  | KLHDC5   | RPS2      |  | EDEM1        | PPP1R15B |  | CISD2   | HSPA9    | PPARGC1A  |         |
| COQ9    | KLHL25   | RPS21     |  | EDN1         | PRDX6    |  | CISD3   | HTATIP2  | PPM1J     |         |
| CORO1C  | LAMA1    | RPS3      |  | EHF          | PROC     |  | CLCN3   | HVCN1    | PPP1R15B  |         |
| COX6C   | LAPTM4B  | RPS4      |  | EIF3I        | PRPF18   |  | CLDN1   | IDH2     | PPP1R1B   |         |
| CREB5   | LASS4    | RPSA      |  | EIF5B        | PSMB7    |  | CLDN10  | IDUA     | PROC      |         |
| CREM    | LCP1     | RUNX3     |  | ENPP1        | PTTG1IP  |  | CNN2    | IFI35    | PRPF18    |         |
| CRHOB   | LDHA     | RUSC2     |  | EPHA2        | PYCR2    |  | CNTNAP1 | IFNGR2   | PRPSAP2   |         |
| CS      | LGALS2   | S100A11   |  | EPHX2        | PYGB     |  | COG4    | IGFBP1   | PSAP      |         |
| CSRP1   | LGALS3   | SARS      |  | ERO1L        | PYGL     |  | COL24A1 | IGSF21   | PSPH      |         |
| CSRP1   | LHCGR    | SAT1      |  | F2R          | QARS     |  | COL27A1 | IL21R    | PTGES     |         |
| CSTF1   | LHFPL2   | SCPEP1    |  | FADS6        | QPCTL    |  | COL6A2  | ILK      | PTRH2     |         |
| CTH     | LIMA1    | SDC1      |  | FAHD2A       | QSOX1    |  | COMMD5  | IMPA2    | PTTG1IP   |         |
| CTNNA1  | LMBR1    | SDHA      |  | FAM188A      | RAB31    |  | COQ9    | INPP5B   | PYCR2     |         |
| CTSB    | LMX1A    | SDPR      |  | FAM211A      | RABEPK   |  | COX5A   | IP6K2    | PYGB      |         |
| CX3CL1  | LPAR2    | SECISBP2L |  | FAM213A      | RASD1    |  | COX6A1  | IQGAP2   | PYGL      |         |
| CX3CR1  | LPIN1    | SELS      |  | FAM214A      | RASSF3   |  | CPEB2   | ISX      | QARS      |         |
| CXCR4   | LPL      | SERPINA5  |  | FAM46A       | RCBTB2   |  | CPNE2   | ITM2B    | QSOX1     |         |
| CYP2D6  | LRCH2    | SFRP2     |  | FAM86A       | RFC5     |  | CRHOB   | IVNS1ABP | RAB20     |         |
| CYR61   | LRRRC8D  | SFXN1     |  | FBXO48       | RGS8     |  | CRIP2   | JARID2   | RAMP2     |         |
| CYSLTR1 | MADH2    | SGK1      |  | FEZ1         | RHOC     |  | CRYM    | JSC      | RARB      |         |
| CYTH1   | MAFA     | SH3BGRL   |  | FGFR2        | RHOG     |  | CS      | JTB      | RASSF3    |         |
| DACT2   | MAFF     | SH3BP5    |  | FHL3         | RIN2     |  | CSNK1D  | JUN      | RASSF9    |         |
| DDB1    | MAP1B    | SHH       |  | FMO6P        | RPB6     |  | CSPG5   | JUP      | RPB5      |         |
| DDO     | MARVELD3 | SIK1      |  | FOS          | RPE      |  | CSRP1   | KCNMB4   | RETSAT    |         |
| DENND5A | MAT1A    | SIPA1L2   |  | FRAS1        | RPL13    |  | CSRP1   | KCTD21   | RFC5      |         |
| DESI1   | MFGE8    | SIRT2     |  | FTH          | RPL15    |  | CTH     | KDM4C    | RGS1      |         |
| DGCR14  | MGAT5B   | SIRT6     |  | GOS2         | RPL23A   |  | CTSB    | KIFC3    | RGS2      |         |
| DGKH    | MGLL     | SLC12A5   |  | GABRG1       | RPL3     |  | CTSC    | KIT      | RHOG      |         |
| DNAAF1  | MGST3    | SLC16A3   |  | GABRP        | RPL36    |  | CTSD    | KLF5     | RICTOR    |         |
| DNAJA1  | MIEN1    | SLC16A5   |  | GADD45B      | RPL7A    |  | CTSL2   | KLF6     | RLBP1     |         |
| DNPEP   | MINOS1   | SLC25A29  |  | GAPDH        | RPL8     |  | CXCL12  | KLHDC5   | RNF185    |         |
| DOHH    | MIOS     | SLC2A1    |  | GC           | RPLP0    |  | CYB5R3  | KLHL24   | RNF34     |         |
| DOK5    | MKRN1    | SLC38A2   |  | GCHFR        | RPS17    |  | CYP27A1 | KLHL3    | RPL3      |         |
| DSC2    | MMP9     | SLC43A2   |  | GCK          | RPS21    |  | CYP2D6  | KTN1     | RPLP0     |         |
| DSCR3   | MPP6     | SLC44A1   |  | GGA.42010    | RPS23    |  | CYP3A4  | LAMB3    | RPS17     |         |
| DSE     | MRPS21   | SLC6A19   |  | gga-mir-3527 | RPS4     |  | CYP3A7  | LAMC1    | RPS4      |         |
| DSG2    | MRV1     | SLC7A11   |  | gga-mir-6599 | RPS6     |  | CYP4V2  | LCP1     | RPSA      |         |
| DSP     | MTHFD2   | SLC9A3R1  |  | GGT1         | SARS     |  | CYR61   | LDHA     | RUSC2     |         |
| DUSP1   | MT-ND3   | SLCO4A1   |  | GNB2L1       | SAT1     |  | CYTH1   | LGALS2   | SARDH     |         |
| DUSP10  | MXD4     | SMOX      |  | GOT1         | SCPEP1   |  | DACT2   | LGALS3   | SARS      |         |
| DUSP7   | MYC      | SNAI1     |  | GPR78        | SDC4     |  | DAD1    | LGMN     | SAT1      |         |
| ECI1    | MYH9     | SNF8      |  | GPRC5A       | SDHC     |  | DDA1    | LHFP     | SCLY      |         |
| EDA     | MYO1C    | SNRPB     |  | GPX4         | SDOS     |  | DDB2    | LHPP     | SCP2      |         |
| EDEM1   | NADK     | SNX2      |  | GSS          | SELS     |  | DERL3   | LIMD2    | SCPEP1    |         |
| EDN1    | NARS     | SPAG1     |  | GSTO1        | SERPINF1 |  | DESI1   | LMBR1    | SCRN2     |         |
| EEPDI   | NAV2     | SPON2     |  | GUSB         | SFXN1    |  | DGCR6   | LMX1A    | SDC1      |         |
| EGLN3   | NBL1     | SPTAN1    |  | HADHA        | SFXN3    |  | DGKH    | LPAR2    | SECISBP2L |         |
| EIF4E3  | NCF4     | SPTBN5    |  | HARBI1       | SGK1     |  | DHRXS   | LPL      | SELS      |         |
| EIF5B   | NDRG1    | SPTY2D1   |  | HOMER2       | SHH      |  | DIS3L2  | LRRRC45  | SELT      |         |
| ELF5    | NDUFA9   | ST14      |  | HPGDS        | SIK1     |  | DNAJB8  | LTF      | SEMA4B    |         |
| ELK3    | NDUFS1   | ST5       |  | HPX          | SIRT2    |  | DOHH    | MAFF     | SEMA5A    |         |
| ENO1    | NDUFS3   | STARD5    |  | HSCB         | SIRT6    |  | DOK5    | MAPK8    | SESN1     |         |
| ENPP1   | NDUFS7   | STIM2     |  | HSD17B11     | SLC16A5  |  | DSE     | MARVELD3 | SFRP2     |         |
| EPHA2   | NDUFS8   | STK38L    |  | HSP70        | SLC17A5  |  | DUSP1   | MAT1A    | SFT2D1    |         |

**Table S1. Genes differentially expressed among groups (Down-regulated genes)**

Criteria: (i) a p-value < 0.001, (ii) a q-value < 0.001, (iii) fold-change > 1.5

| Control V.S. ILTV (EGFP+) |           |          | Control V.S. ILTV (APC+) |          | Control V.S. Conditioned medium (APC+) |           |           |          |         |
|---------------------------|-----------|----------|--------------------------|----------|----------------------------------------|-----------|-----------|----------|---------|
| ABCF2                     | HMGB2     | REV3L    | AACS                     | NUDCD1   | 42253                                  | EIF2S1    | MDN1      | RPL7L1   | YWHAQ   |
| ACTR6                     | HMGN1     | RFC1     | ABCC1                    | NUP107   | AAED1                                  | EIF2S2    | MED10     | RPRD2    | ZC3H13  |
| ADI1                      | HMGN2     | RFC3     | ABCF2                    | NUP153   | ABCB11                                 | EIF3A     | MEIS2     | RRM1     | ZC3H15  |
| AGA                       | HNF1A     | RFWD2    | ACTR6                    | NUP50    | ABCE1                                  | EIF3B     | METAP2    | RRM2     | ZCCHC17 |
| AGPAT6                    | HNF4BETA  | RIF1     | ALAS1                    | ORC5L    | ABCF2                                  | EIF3J     | MFAP3     | RRP15    | ZNF207  |
| ALAS1                     | HNF4G     | RIOK1    | ALDH8A1                  | OSGIN2   | ACAT2                                  | EIF3M     | MKI67     | RRP1B    | ZNF318  |
| ALDH8A1                   | HNRNPLL   | RNASEN   | ALG6                     | OTUD6B   | ACL                                    | EIF4A2    | MKI67IP   | RSL1D1   | ZNF326  |
| ALG6                      | HNRNPU    | RNF7     | ANKHD1                   | PAPD7    | ACTL6A                                 | EIF4E     | MOBK13    | RSPH6A   | ZNF407  |
| AMIGO2                    | HNRPLD    | ROCK1    | ANLN                     | PAXBP1   | ACTR3B                                 | EIF4G1    | MPHOSPH10 | RSRC2    | ZNF451  |
| ANLN                      | HRG       | RORA     | ANP32B                   | PCF11    | ACTR6                                  | EIF4G2    | MPHOSPH6  | RTCA     | ZNF598  |
| ANP32B                    | HRH2      | RPA2     | APLP2                    | PEX1     | ADI1                                   | EIF5      | MRPL3     | RTF1     | ZRANB2  |
| AP1G1                     | HSPA14    | RPRD1B   | APOB                     | PHRF1    | AHSA1                                  | EIF5A2    | MRPS27    | RWDD1    |         |
| APITD1                    | IL28RA    | RRAGC    | AQR                      | PIT 54   | AIMP1                                  | ELAVL1    | MRPS30    | SALL3    |         |
| APOB                      | INCENP    | RRM2     | ARL5A                    | PITPNM3  | AIMP2                                  | ELP2      | MRPS31    | SAP130   |         |
| AQR                       | INTS10    | RSPH6A   | ARMC8                    | PLG      | AKAP1                                  | EMG1      | MRPS35    | SAR1B    |         |
| ARGLU1                    | IPO9      | RSRC2    | ARPP21                   | PMPCA    | ALAS1                                  | ERGIC2    | MRPS5     | SASS6    |         |
| ARHGAP11A                 | ISCU      | RTCA     | ATN1                     | PNN      | ALDH8A1                                | ERRF1     | MSH2      | SBF1     |         |
| ARHGAP5                   | ITIH2     | RTTN     | ATP6AP1L                 | PNRC2    | AMD1                                   | ESF1      | MTAP      | SC4MOL   |         |
| ARHGEF11                  | JAG2      | SAFB2    | ATRX                     | PIIP5K2  | ANAPC1                                 | ESYT2     | MYB       | SDAD1    |         |
| ARLSA                     | JMJD1C    | SAMSN1   | B4GALT6                  | PPP2R2C  | ANP32B                                 | ETF1      | MYBBP1A   | SEC31A   |         |
| ASF1A                     | JPH1      | SAP130   | BMS1                     | PPP4R2   | ANXA5                                  | EXOSC2    | MYBL2     | SEC63    |         |
| ASPM                      | KAT6A     | SAR1B    | BRD4                     | PPRC1    | APITD1                                 | EXOSC7    | NAA15     | SERBP1   |         |
| ATN1                      | KCTD9     | SASS6    | BXDC2                    | PRCC     | AQR                                    | EZH2      | NAA25     | SERPINA1 |         |
| ATP6AP1L                  | KDELRL2   | SBD5     | C12ORF66                 | PRPF40A  | ARFGAP3                                | FADS2     | NAP1L4    | SERPINB1 |         |
| ATRX                      | KIF11     | SCML2    | C17ORF71                 | PRPF4B   | ARHGAP17                               | FAM120A   | NASP      | SET      |         |
| B3GNT2                    | KIF15     | SDAD1    | C21H1orf158              | PRRC2C   | ARHGAP5                                | FAM171A1  | NAT10     | SF3B3    |         |
| BAMBI                     | KIF18A    | SEC31A   | CAPRIN1                  | PSIP1    | ARHGEF12                               | FAM35A    | NCBP1     | SFPQ     |         |
| BAZ1B                     | KIF18B    | SEPX1    | CCAR1                    | PSME3    | ARID1B                                 | FAM44B    | NCDN      | SFR1     |         |
| BCOR                      | KIF4A     | SERPINA1 | CCDC59                   | PSPC1    | ARID5B                                 | FARSB     | NCL       | SIKE1    |         |
| BET1L                     | KNG1      | SERPINH1 | CCDC99                   | PTGFRN   | ARL13B                                 | FAT1      | NCOA4     | SIRT1    |         |
| BLMH                      | KPNA2     | SFPQ     | CCNB2                    | PTPRG    | ARMC8                                  | FBXO30    | NDC1      | SKA3     |         |
| BMI1                      | KPNB1     | SH3D19   | CCNJ                     | PWP1     | ARVCF                                  | FBXW11    | NENF      | SKIV2L2  |         |
| BMS1                      | LAMP5     | SIRT4    | CD164                    | PWP2     | ASF1A                                  | FCF1      | NFIB      | SKP2     |         |
| BPIFB8                    | LARGE     | SKA3     | CDC45                    | RALGAPA1 | ASUN                                   | FECH      | NHP2L1    | SLBP     |         |
| BRC1A                     | LASS6     | SLC23A1  | CENPF                    | RANGAP1  | ATN1                                   | FEN1      | NLE1      | SLC18A2  |         |
| BUB1                      | LCAT      | SLC5A12  | CENPF                    | RBBP4    | ATP6AP1L                               | FETUB     | NMNAT1    | SLC22A18 |         |
| BXDC2                     | LIFR      | SLC6A9   | CENPL                    | RIF1     | ATRX                                   | FGA       | NOL6      | SLC23A1  |         |
| C16ORF88                  | LMNB2     | SLTM     | CENPT                    | RIMBP2   | BASP1                                  | FGB       | NOL9      | SLC27A5  |         |
| C18ORF21                  | LRP2      | SMARCA5  | CEP152                   | ROCK1    | BAZ1A                                  | FGF23     | NOLC1     | SLC35E3  |         |
| C19ORF12                  | LRRC46    | SMC2     | CHAF1A                   | RORA     | BLMH                                   | FGFR10P2  | NOM1      | SMARCA5  |         |
| C1orf112                  | LRRCC1    | SMC3     | CHAF1B                   | RPRD2    | BLOC1S5                                | FGFR4     | NOP56     | SMC2     |         |
| C1QTNF6                   | LUC7L2    | SMC4     | CHERP                    | RSRC2    | BMS1                                   | FKBP4     | NOP58     | SMC3     |         |
| C21H1orf158               | LUC7L3    | SMC6     | CKAP2                    | RTCA     | BRD2                                   | FN1       | NPM1      | SMC4     |         |
| C2orf44                   | LYAR      | SMEK1    | CLASP1                   | RTF1     | BUB1                                   | FRYL      | NPM3      | SMC6     |         |
| C4ORF43                   | MAK16     | SOS1     | CLDN2                    | SALL3    | BXDC2                                  | FSIP1     | NSD1      | SNRPB2   |         |
| C5H15orf41                | MASP1     | SPC25    | CREBBP                   | SAP130   | C17ORF71                               | GABPA     | NT5C3     | SOS1     |         |
| CABLES1                   | MAST2     | SRD5A3   | CRKL                     | SATB2    | C17orf75                               | GAMT      | NT5C3L    | SPC25    |         |
| CAPRIN1                   | MATR3     | SREK1    | CTBP1                    | SCAPER   | C18ORF21                               | GAS2      | NUBP2     | SPTSSA   |         |
| CCDC14                    | MBNL1     | SRRM1    | CTCF                     | SCD      | C20H20ORF24                            | GCLM      | NUCKS1    | SREK1    |         |
| CCDC27                    | MCM3      | SRSF3    | CTNS                     | SEC23A   | C22ORF32                               | GCN1L1    | NUDC      | SRP19    |         |
| CCDC47                    | MDN1      | SRSF6    | CUL4B                    | SEC24A   | C4ORF43                                | GCSH      | NUDCD1    | SRSF11   |         |
| CCDC50                    | MEIS2     | SRSF7    | CYB5A                    | SEC31A   | C5H15ORF29                             | GEMIN2    | NUDT1     | SRSF3    |         |
| CCDC66                    | MELK      | SS18     | CYP2C45                  | SEMA6A   | CALM                                   | GEMIN5    | NUP107    | SRSF6    |         |
| CCDC99                    | MF12      | SSB      | CYP51A1                  | SERPINH1 | CAMSAP1                                | GGA.42833 | NUP43     | SRSF7    |         |
| CCNA2                     | MKI67     | SSR1     | DBX2                     | SETD4    | CAPRIN1                                | GGA.4927  | NUP50     | SS18     |         |
| CDC23                     | MMRN2     | STAG2    | DCTD                     | SFPQ     | CAV1                                   | GJB1      | NUPL1     | SSB      |         |
| CDC45                     | MMS22L    | STRN3    | DDX19B                   | SGOL2    | CCAR1                                  | GLT1D1    | NUPL2     | SSR1     |         |
| CDHR5                     | MOC52     | SULT1C   | DDX24                    | SLBP     | CCDC104                                | GMNN      | ODC1      | SSRP1    |         |
| CENPE                     | MPHOSPH10 | SUMO2    | DDX3X                    | SLC18A1  | CCDC50                                 | GNB1L     | OLA1      | ST13     |         |
| CENPF                     | MSH6      | SUPV3L1  | DDX46                    | SLC22A16 | CCDC59                                 | GNL2      | OLFM3     | STAG2    |         |
| CENPF                     | MTMR8     | SURF6    | DDX47                    | SLC23A1  | CCDC66                                 | GNL3      | OPA1      | STRN3    |         |
| CENPI                     | MYB       | SVIL     | DLGAP5                   | SLC38A9  | CCDC88A                                | GPD1      | ORC5L     | SUDS3    |         |
| CENPJ                     | MYBL2     | SYNCRIP  | DNAJC2                   | SMC2     | CCDC88C                                | GPN3      | OTOP1     | SUGT1    |         |
| CENPP                     | MYO1B     | SYNE1    | DUT                      | SMC4     | CCNA2                                  | GPR143    | OTUD6B    | SUMO2    |         |
| CEP152                    | MZT1      | TAF15    | EGLN1                    | SMC6     | CCNH                                   | GPSM2     | OTUD7A    | SUPV3L1  |         |
| CEP290                    | NASP      | TBC1D5   | EIF3A                    | SMEK1    | CCNYL1                                 | GSE1      | PAPD7     | SURF6    |         |
| CHAF1B                    | NAT10     | TBX2     | EIF4G1                   | SNAP47   | CCT2                                   | GSTA3     | PAPOLA    | SVIL     |         |
| CHAMP1                    | NCF1      | TBX3     | EIF5                     | SPATA17  | CCT5                                   | GTF2F2    | PARP1     | SYNCRIP  |         |
| CHD9                      | NCL       | TDRD15   | EP400NL                  | SPC25    | CCT6                                   | GTPBP4    | PCBD1     | SYNE1    |         |
| CHDH                      | NCOA4     | TEX10    | ERCC5                    | SPEN     | CD164                                  | GTSE1     | PCGF5     | TAF15    |         |
| CHORDC1                   | NDC80     | TFDP1    | ERP29                    | SRRM1    | CD276                                  | H2AFZ     | PCNA      | TAK3     |         |
| CHRA1                     | NEK2      | THOC2    | ESF1                     | SRSF11   | CDC2                                   | HAAO      | PDCD11    | TBC1D5   |         |
| CHTF8                     | NFIB      | TINAG    | ESYT2                    | SRSF6    | CDC20                                  | HDAC2     | PDCD5     | TBL1X    |         |
| CKAP2                     | NIF3L1    | TLE1     | ETF1                     | SSB      | CDC40                                  | HDX       | PEO1      | TBX2     |         |

|           |         |          |           |          |          |          |         |          |  |
|-----------|---------|----------|-----------|----------|----------|----------|---------|----------|--|
| CLDN2     | NIPA2   | TLK2     | FADS2     | SSR1     | CDCA7    | HERC1    | PFN2    | TCEANC   |  |
| CLSPN     | NLE1    | TMED5    | FAM164C   | STAG2    | CDK5RAP2 | HMG1     | PHF3    | TCERG1   |  |
| CMTM8     | NOC3L   | TMEM115  | FAXC      | STRN3    | CDV3     | HMGB1    | PHF6    | TCP1     |  |
| CNBP      | NOL9    | TMEM123  | FBRSL1    | SYNCRIP  | CENPE    | HMGN1    | PHRF1   | TDRD3    |  |
| CNI       | NOLC1   | TMEM167A | FBXO11    | SYNE1    | CENPH    | HMGN2    | PIT 54  | TERF1    |  |
| COBLL1    | NOM1    | TMEM55A  | FECH      | TEX10    | CENPK    | HNF1A    | PITPNB  | TEX10    |  |
| CPSF4     | NOP14   | TMX3     | FETUB     | THBS1    | CENPL    | HNF4G    | PITPNM3 | TFAM     |  |
| CREB3L3   | NOP56   | TNIP2    | FGA       | TMEM161B | CENPW    | HNRNPA3  | PITRM1  | TFDP1    |  |
| CREBBP    | NOP58   | TNNC1    | FGB       | TMPO     | CEP89    | HNRNPAB  | PITX3   | TFDP2    |  |
| CTBP1     | NPM1    | TOP2A    | FN1       | TMPRSS2  | CHAF1A   | HNRNPH1  | PLG     | TGS1     |  |
| CYP2C45   | NSD1    | TOP2B    | FRYL      | TMX3     | CHAF1B   | HNRNPH3  | PLTP    | THBS1    |  |
| CYP2D7P1  | NT5C3   | TOX2     | GNL2      | TNNC1    | CHD4     | HNRNPLL  | PMPCA   | THUMPD1  |  |
| CYP2H1    | NUCB2   | TPX2     | GPR143    | TNRC15   | CHD7     | HNRNPM   | PNN     | TIMM44   |  |
| CYP2R1    | NUCKS1  | TRA2A    | GPR144    | TOP2A    | CHD9     | HNRNPR   | PNP     | TLK2     |  |
| CZH5ORF42 | NUDC    | TRAI     | GPR162    | TOP2B    | CHDH     | HNRNPU   | PNRC2   | TLN1     |  |
| CZH9ORF41 | NUDCD1  | TRAM1    | GTPBP4    | TRA2A    | CHDZ     | HNRPD1   | PODN    | TMEM115  |  |
| DCTD      | NUDT19  | TRIP13   | GTSE1     | TRAM1    | CHERP    | HS3ST1   | PPID    | TMEM183B |  |
| DDX11     | NUF2    | TRRAP    | HAAO      | TRMT1L   | CHORDC1  | HS3ST2   | PPIG    | TMEM70   |  |
| DDX49     | NUP153  | TTC27    | HEATR1    | TRRAP    | CHPT1    | HS6ST1   | PPP2R2C | TMPO     |  |
| DEK       | NUP210  | TTL7     | HENMT1    | TTBK1    | CHTF8    | HSF2     | PPRC1   | TMPRSS2  |  |
| DEPDC1B   | NUSAP1  | TTR      | HMGN2     | TTC27    | CIRBP    | HSP90AB1 | PRCC    | TMX3     |  |
| DHR53     | OLA1    | TUBB     | HNF1A     | UMPS     | CIRH1A   | HSP90B1  | PREP    | TNNC1    |  |
| DHR57B    | OLFM3   | TXNL1    | HNRNPLL   | USP16    | CKAP2    | HSPA14   | PRMT3   | TOP2B    |  |
| DICER1    | ORC5L   | TYMS     | HNRNPU    | USP9X    | CLASP2   | HSPA4    | PROX1   | TOX2     |  |
| DKC1      | PAH     | UBLCP1   | HSPA14    | VBP1     | CLDN2    | HSPA4L   | PRPF38B | TPRKB    |  |
| DLGAP5    | PAPD5   | UPF1     | HSPA4L    | WDR3     | CLSPN    | HSPE1    | PRPF40A | TRA2A    |  |
| DNAJC2    | PCBD1   | UPF2     | IKBIP     | WDR36    | CMTM8    | HSPH1    | PRPF4B  | TRAM1    |  |
| DRD1      | PCF11   | USP16    | IL2RB     | XPO1     | CNBP     | IGF2BP3  | PRPF8   | TRIM37   |  |
| DSCC1     | PCNT    | USP22    | INCENP    | XPO5     | CNOT2    | IL23R    | PRRC2C  | TRIP13   |  |
| DUT       | PDCD11  | USP9X    | IPO7      | XPO7     | COL4A5   | IMPAD1   | PSAT1   | TRMT1L   |  |
| DZIP1     | PK4     | VAV3     | ITGB8     | YWHAQ    | COPS3    | INCENP   | PSIP1   | TRNAU1AP |  |
| ECD       | PER2    | VDAC3    | IVD       | ZC3H13   | COP55    | IPO9     | PSMA6   | TRRAP    |  |
| EIF1AY    | PFKFB3  | WDR12    | JAG2      | ZNF326   | CPSF4    | IVD      | PSMD5   | TSR1     |  |
| EIF3A     | PHC2    | WDR3     | JAK1      | ZNF598   | CPSF6    | JAG2     | PSME3   | TTC27    |  |
| EIF4E     | PIT 54  | XRCC3    | KCNQ1     | ZRANB2   | CREBBP   | KCTD9    | PSPC1   | TTC39A   |  |
| EIF5      | PITPNM3 | XRCC5    | KIF11     |          | CSE1L    | KDEL2    | PTCH2   | TTF1     |  |
| ERP29     | PKP2    | YWHAQ    | KIF15     |          | CTBP1    | KIAA0020 | PTGFRN  | TTK      |  |
| ESF1      | PLG     | YWHAQ    | KIF1B     |          | CWC22    | KIAA1468 | PTP4A2  | TTPA     |  |
| EXO1      | PLXNB2  | ZC2HC1A  | KNG1      |          | CYP2C45  | KIF11    | PTPLB   | TTR      |  |
| FAM103A1  | PMPCA   | ZC3H13   | KPNA3     |          | CYP2H1   | KIF15    | PUS1    | TWISTNB  |  |
| FAM120A   | PNN     | ZC3H6    | LCA5L     |          | CYP2R1   | KIF18B   | PUS7    | TXNL1    |  |
| FAM13B    | PNP     | ZNF318   | LMNB2     |          | CYP51A1  | KIF24    | PWP1    | TYMS     |  |
| FAM35A    | PNRC2   | ZNF395   | LUC7L3    |          | DBR1     | KIF2C    | PWP2    | U2AF1    |  |
| FAM44B    | POLE3   | ZNF407   | LYAR      |          | DBX2     | KIF4A    | QDPR    | UBE2D3   |  |
| FAR5B     | POP1    | ZNF451   | MARK3     |          | DCTD     | KIF5B    | QSER1   | UBE21    |  |
| FETUB     | PPIG    | ZNF598   | MATR3     |          | DCUN1D1  | KPNA3    | RABEP1  | UBE2L3   |  |
| FGB       | PPP1R8  | ZNF6     | MBNL1     |          | DDX10    | KPNA4    | RABGGTB | UBE2V1   |  |
| FGFR1OP2  | PPRC1   | ZNF644   | MCM6      |          | DDX11    | KPNB1    | RAE1    | UBE4B    |  |
| FGFR3     | PRCC    | ZRANB2   | MED1      |          | DDX18    | KRT18    | RAN     | UBQLN1   |  |
| FN1       | PREP    |          | METTL23   |          | DDX19B   | LAMA2    | RANBP1  | UCHL3    |  |
| FN3K      | PRMT3   |          | MIPOL1    |          | DDX24    | LARGE    | RANGAP1 | UCHL5    |  |
| FRK       | PROX1   |          | MKI67     |          | DDX3X    | LARP1    | RAP1B   | UMPS     |  |
| FRMD4B    | PRPF40A |          | MPHOSPH10 |          | DDX46    | LARP7    | RBBP4   | UPF1     |  |
| FSTL4     | PRPF4B  |          | MST4      |          | DDX47    | LIFR     | RBM12B  | USP14    |  |
| FUBP1     | PRRC2C  |          | MYB       |          | DHFR     | LMBRD1   | RBM19   | USP22    |  |
| FZD3      | PSIP1   |          | MYBBP1A   |          | DHODH    | LMNB2    | RBM25   | USP30    |  |
| GAMT      | PSMC3IP |          | MYBL2     |          | DIMT1    | LMO7     | RBM26   | USP36    |  |
| GAS2      | PSMD5   |          | MYO1B     |          | DIO1     | LPHN2    | RBM45   | USP7     |  |
| GCN1L1    | PTCD3   |          | MYO3B     |          | DKC1     | LRRFIP2  | RBM46   | USP8     |  |
| GGA.42833 | PTGES2  |          | NAA15     |          | DLGAP5   | LSM12    | RBMX    | USP9X    |  |
| GLULD1    | PTP4A1  |          | NAA25     |          | DNAJC2   | LSM6     | RDX     | UTP6     |  |
| GMNN      | PTPN14  |          | NAPEPLD   |          | DNAJC8   | LSM7     | REEP2   | VBP1     |  |
| GNB1L     | PUS7    |          | NASP      |          | DNTTIP2  | LUC7L2   | RFC2    | VDAC3    |  |
| GPATCH1   | PWP1    |          | NCL       |          | DSCC1    | LUC7L3   | RG9MTD1 | VPS36    |  |
| GPD1      | PWP2    |          | NCOA4     |          | DSCR2    | LY96     | RHOBTB1 | WDR11    |  |
| GPR143    | PXDC1   |          | NENF      |          | DUT      | LYAR     | RIF1    | WDR12    |  |
| GPR64     | PXMP3   |          | NFIB      |          | EAF2     | MAK16    | RIOK1   | WDR3     |  |
| GRHL3     | QDPR    |          | NLE1      |          | EBNA1BP2 | MANF     | RIOK2   | WDR43    |  |
| GSTZ1     | RABEP1  |          | NOL6      |          | ECD      | MAOA     | RNF7    | WDR91    |  |
| GTPBP4    | RAD51B  |          | NOLC1     |          | EDNRA    | MAPK6    | ROCK1   | WWC3     |  |
| H2AFZ     | RAN     |          | NR3C1     |          | EED      | MARK3    | RORA    | XPA      |  |
| HAAO      | RBL1    |          | NSD1      |          | EEF1A    | MATR3    | RPA2    | XPO1     |  |
| HECA      | RBM25   |          | NSF       |          | EGLN1    | MBNL1    | RPA3    | XPO5     |  |
| HHEX      | RBM26   |          | NT5C3     |          | EIF1AY   | MCM2     | RPAP3   | XRCC5    |  |
| HIPK2     | RP4     |          | NUCKS1    |          | EIF2AK1  | MCM6     | RPF1    | XRN2     |  |
| HMG1      | RC3H2   |          | NUDC      |          | EIF2B2   | MCTS1    | RPF2    | YAF2     |  |
